# Supplementary material
Source: publisher figshare collection journal article supplement (https://future-science-group.figshare.com/ndownloader/files/28532721)
Supplement: Supplementary file 1 [file 28532721]

## Sheet: Ark1
ATC Code	Name	ATC Group	Description
B03XA02	Darbepoetin Alfa	B	Blood and blood forming organs
H02AB06	Prednisolon	H	Systemic hormonal prep, excluding sex hormones
J01CA01	Ampicillin	J	General antiinfectives for systemic use
J01CE01	Benzylpenicillin	J	General antiinfectives for systemic use
J01CF01	Dicloxacillin	J	General antiinfectives for systemic use
J01CR02	Amoxicillin	J	General antiinfectives for systemic use
J01CR05	Piperacillin	J	General antiinfectives for systemic use
J01DC02	Cefuroxim	J	General antiinfectives for systemic use
J01DD01	Cefotaxim	J	General antiinfectives for systemic use
J01DD02	Ceftazidim	J	General antiinfectives for systemic use
J01DD04	Ceftriaxon	J	General antiinfectives for systemic use
J01DH02	Meropenem	J	General antiinfectives for systemic use
J01FA09	Clarithromycin	J	General antiinfectives for systemic use
J01GB03	Gentamicin	J	General antiinfectives for systemic use
J01MA02	Ciprofloxacin	J	General antiinfectives for systemic use
J01XA01	Vancomycin	J	General antiinfectives for systemic use
J01XD01	Metronidazol	J	General antiinfectives for systemic use
J02AC01	Fluconazol	J	General antiinfectives for systemic use
J02AX04	Caspofungin	J	General antiinfectives for systemic use
J02AX06	Anidulafungin	J	General antiinfectives for systemic use
J02AA01	Amphotericin	J	General antiinfectives for systemic use
J05AB01	Aciclovir	J	General antiinfectives for systemic use
J06BA02	Immunoglobulines	J	General antiinfectives for systemic use
L01CB01	Etoposid	L	Antineoplastic and immunomodulating agents
L01DB01	Doxorubicin	L	Antineoplastic and immunomodulating agents
L01XA01	Cisplatin	L	Antineoplastic and immunomodulating agents
L01XC23	Elotuzumab	L	Antineoplastic and immunomodulating agents
L01XC24	Daratumumab	L	Antineoplastic and immunomodulating agents
L01XX32	Bortezomib	L	Antineoplastic and immunomodulating agents
L01XX45	Carfilzomib	L	Antineoplastic and immunomodulating agents
L01XX50	Ixazomib	L	Antineoplastic and immunomodulating agents
L01XX52	Venetoclax	L	Antineoplastic and immunomodulating agents
L01AA01	Cyclophosphamid	L	Antineoplastic and immunomodulating agents
L01AA03	Melphalan	L	Antineoplastic and immunomodulating agents
L01AA09	Bendamustin	L	Antineoplastic and immunomodulating agents
L03AX16	Plerixafor	L	Antineoplastic and immunomodulating agents
L03AA02	Filgrastim	L	Antineoplastic and immunomodulating agents
L03AA14	Lipegfilgrastim	L	Antineoplastic and immunomodulating agents
L04AX02	Thalidomid	L	Antineoplastic and immunomodulating agents
L04AX04	Lenalidomid	L	Antineoplastic and immunomodulating agents
L04AX06	Pomalidomid	L	Antineoplastic and immunomodulating agents
M05BA03	Pamidronsyre	M	Musculo-skeletal system
M05BA08	Zoledronsyre	M	Musculo-skeletal system
M05BX04	Denosumab	M	Musculo-skeletal system
V03AF08	Palifermin	V	Various
